# Supplementary material for: RIP2 filament formation is required for NOD2 dependent NF-κB signalling
Source: PubMed Central journal article supplement (PMC6168553; doi:10.1038/s41467-018-06451-3), 2018-10-02
Supplement: 41467_2018_6451_MOESM1_ESM.pdf [file 41467_2018_6451_MOESM1_ESM.pdf]

## Supplementary Information

Pellegrini et al. **RIP2 filament formation is required for NOD2 dependent NF- $\kappa$ B signalling**

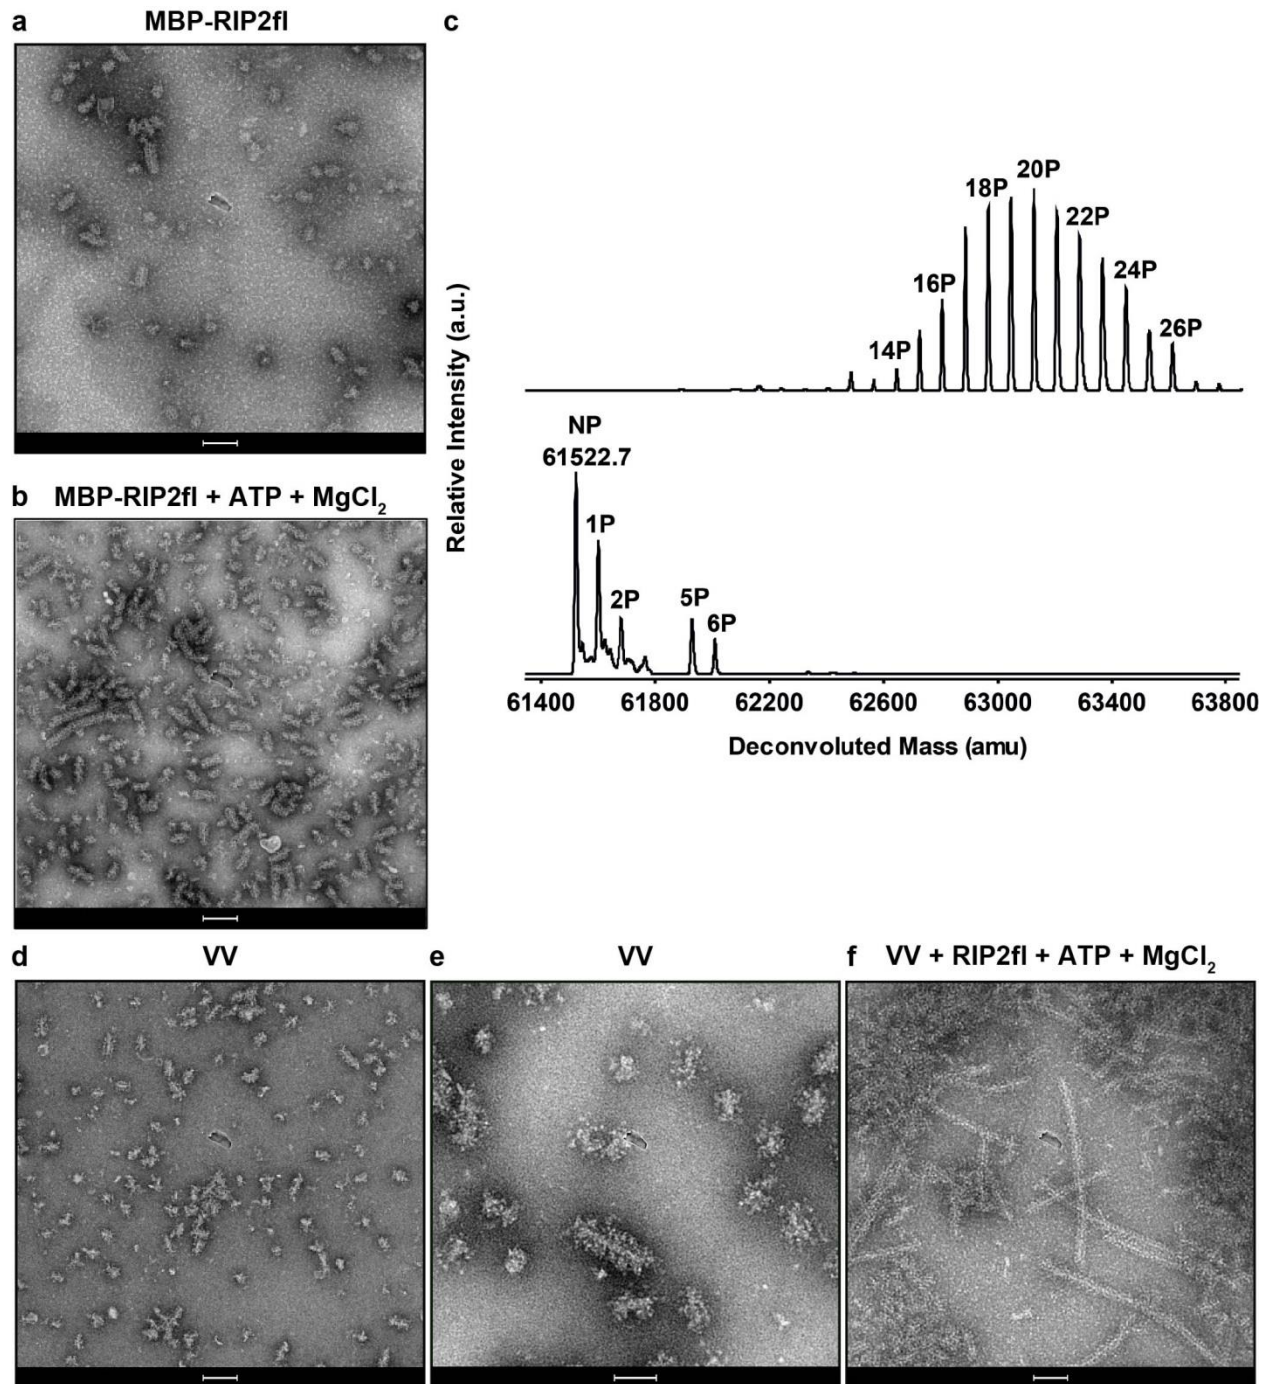

**Supplementary Figure 1: Phosphorylation profile of recombinant RIP2fl by ESI-TOF mass spectrometry**

a-b: Negative-stain micrographs of (a) MBP-RIP2fl from the amylose resin eluate, (b) MBP-RIP2fl from the amylose resin eluate plus ATP and magnesium. Scale bars are 100 nm.

c: The mass spectra of recombinant tag-free RIP2fl was acquired by electrospray ionization time-of-flight mass spectrometry (ESI-TOF MS). Deconvoluted mass spectra are shown for RIP2fl immediately after purification (top) and after lambda phosphatase treatment (bottom).

d-f: Negative-stain micrographs of (d) RIP2fl from the column void volume (VV), (e) zoomed-in view of RIP2fl from the VV, (f) VV RIP2fl plus 5-fold of non-aggregated RIP2fl, ATP and magnesium. Scale bars are 100 nm, 50 nm and 100 nm respectively.

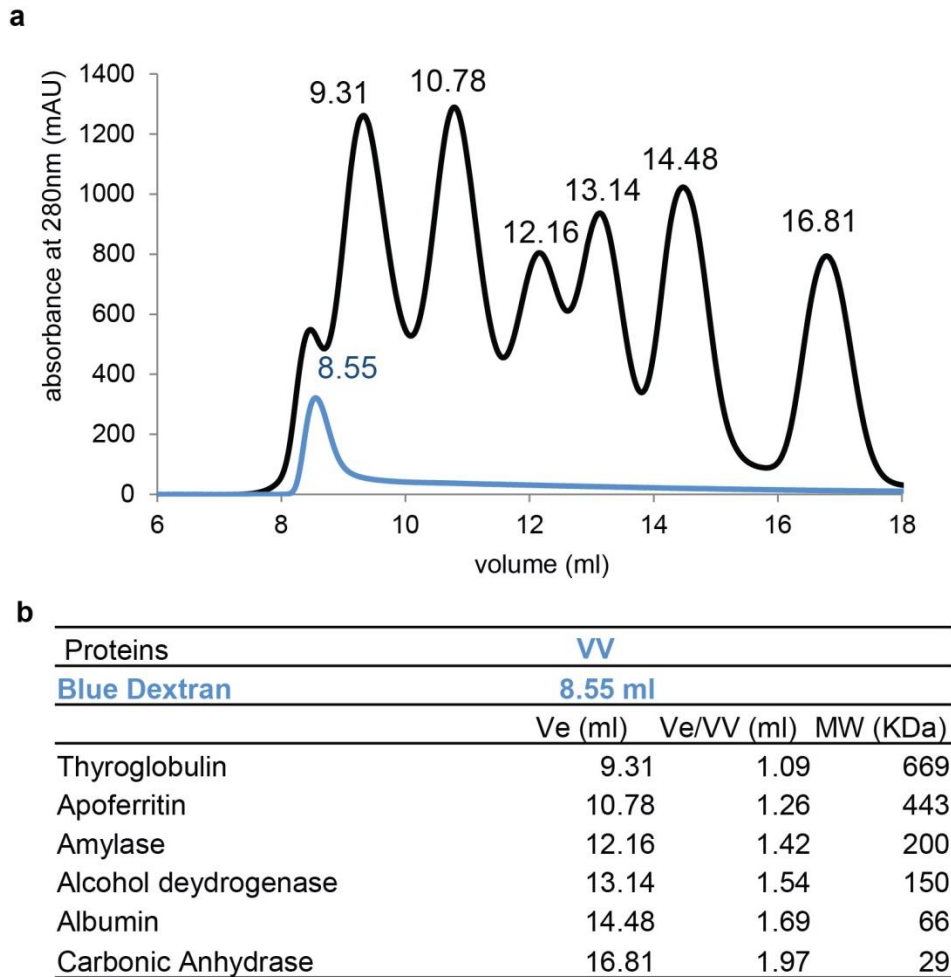

**Supplementary Figure 2: Calibration curve of Superdex 200 gel filtration column**

a: Calibration curve of Superdex 200 gel filtration column, showing the elution volume ( $V_e$ ) of blue dextran (in blue) and protein standards (in black).

b: Table showing the correspondence between each standard protein, elution volume ( $V_e$ ),  $V_e/VV$  ratio and molecular weight (MW) expected.

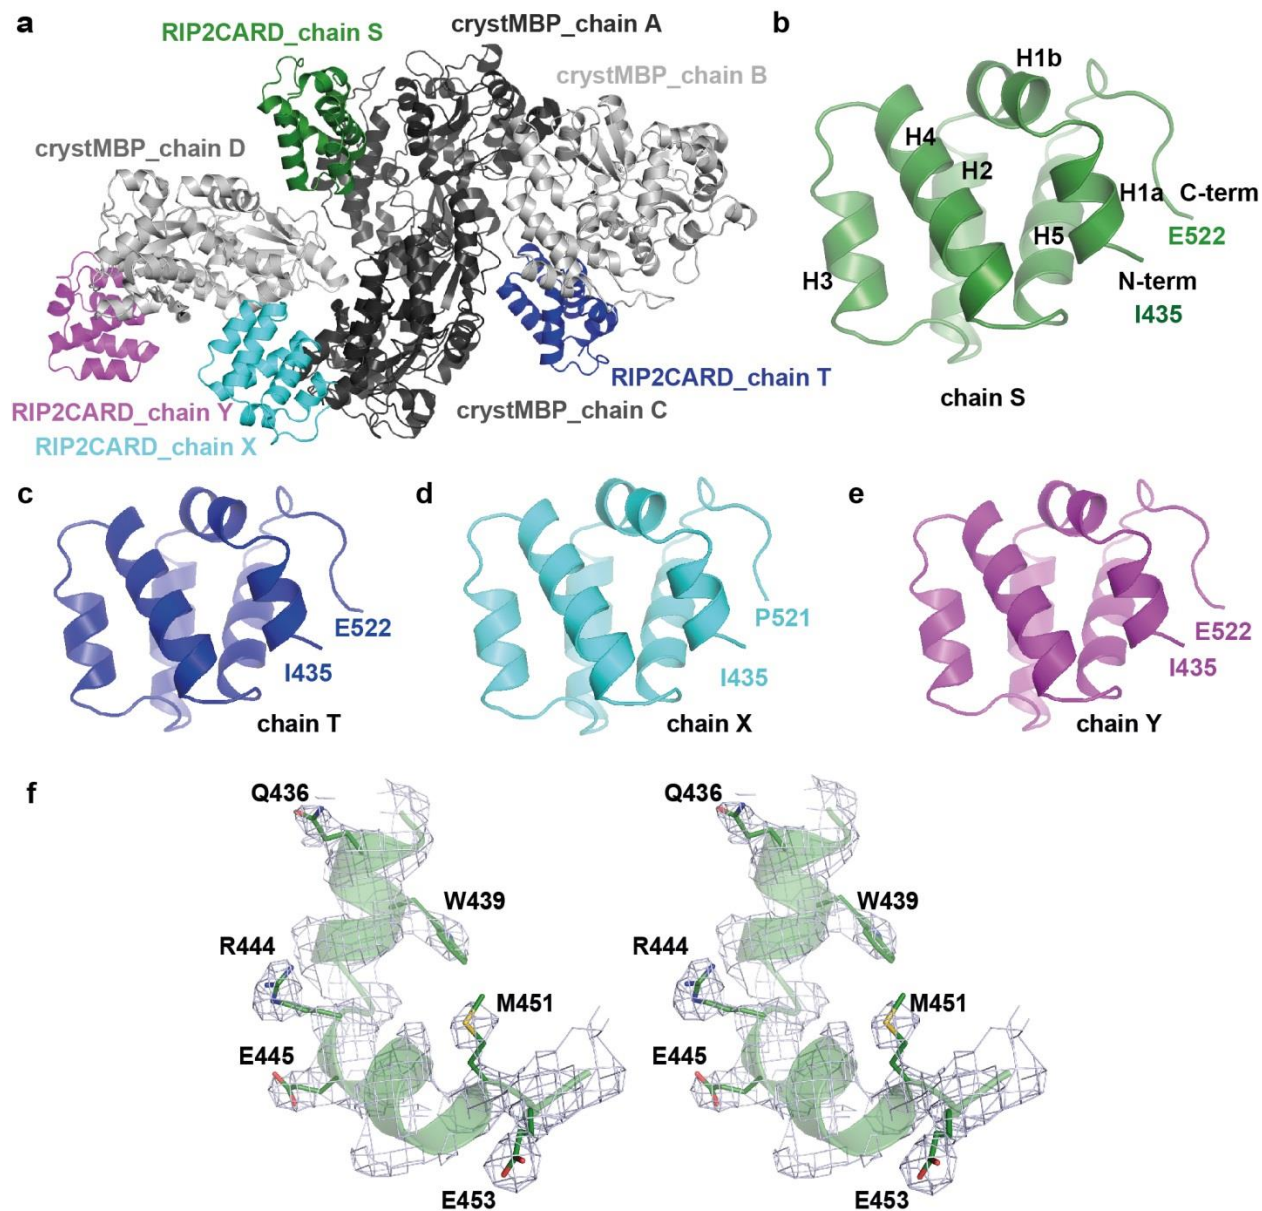

### Supplementary Figure 3: Overview of crystMBP-RIP2CARD asymmetric unit

a: Ribbon diagram of the contents of the crystMBP-RIP2CARD asymmetric unit, which comprises four MBP subunits (chains A, B, C, D), each fused to a RIP2CARD molecule (chains S, T, X, Y).

b-e: Ribbon diagrams of the different RIP2CARD chains in the asymmetric unit: (b) chain S, (c) chain T, (d) chain X and (e) chain Y. All the chains ends with E522, except chain X which ends at P521.

f: Stereo image of the 2Fo-Fc map, contoured at 1.5  $\sigma$ , showing the helices 1 and 2 of RIP2CARD-chain S (residues 435-454).

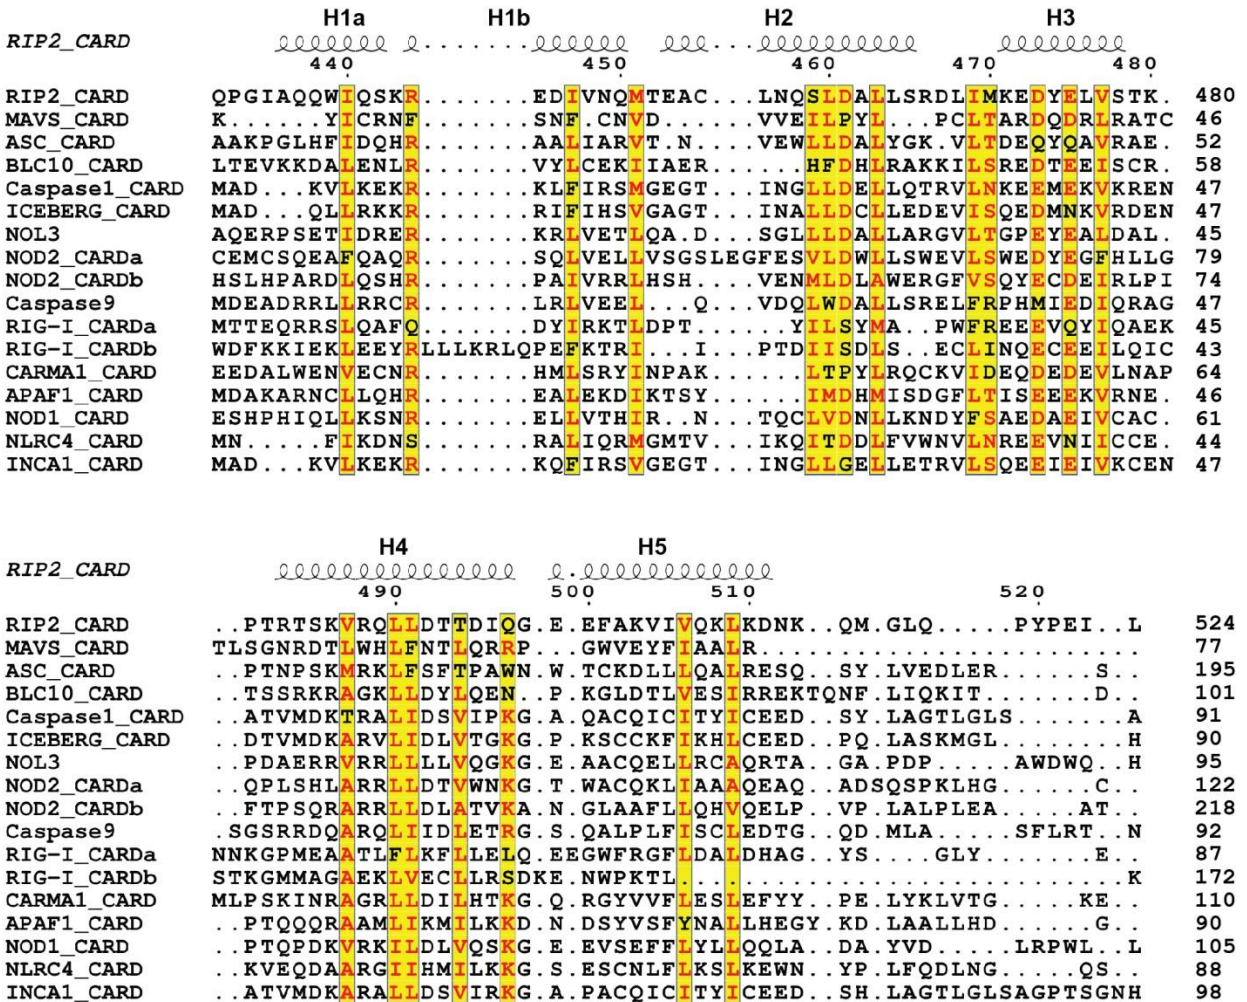

**Supplementary Figure 4: Structure-based sequence alignment of relevant human CARDs.**

Structure-based alignment of CARDs belonging to receptors and adaptor proteins of the innate immune system. The alignment was computed using the structure-based multiple-sequence alignment programme 3DCoffee<sup>1</sup> for which PDB models are automatically selected. EXPRESSO output was used as input for ESPrnt 3.0<sup>2</sup>, to generate the figure. The secondary structure assignment of the RIP2CARD crystal structure is shown on top. Similar residues are red and highlighted in yellow.

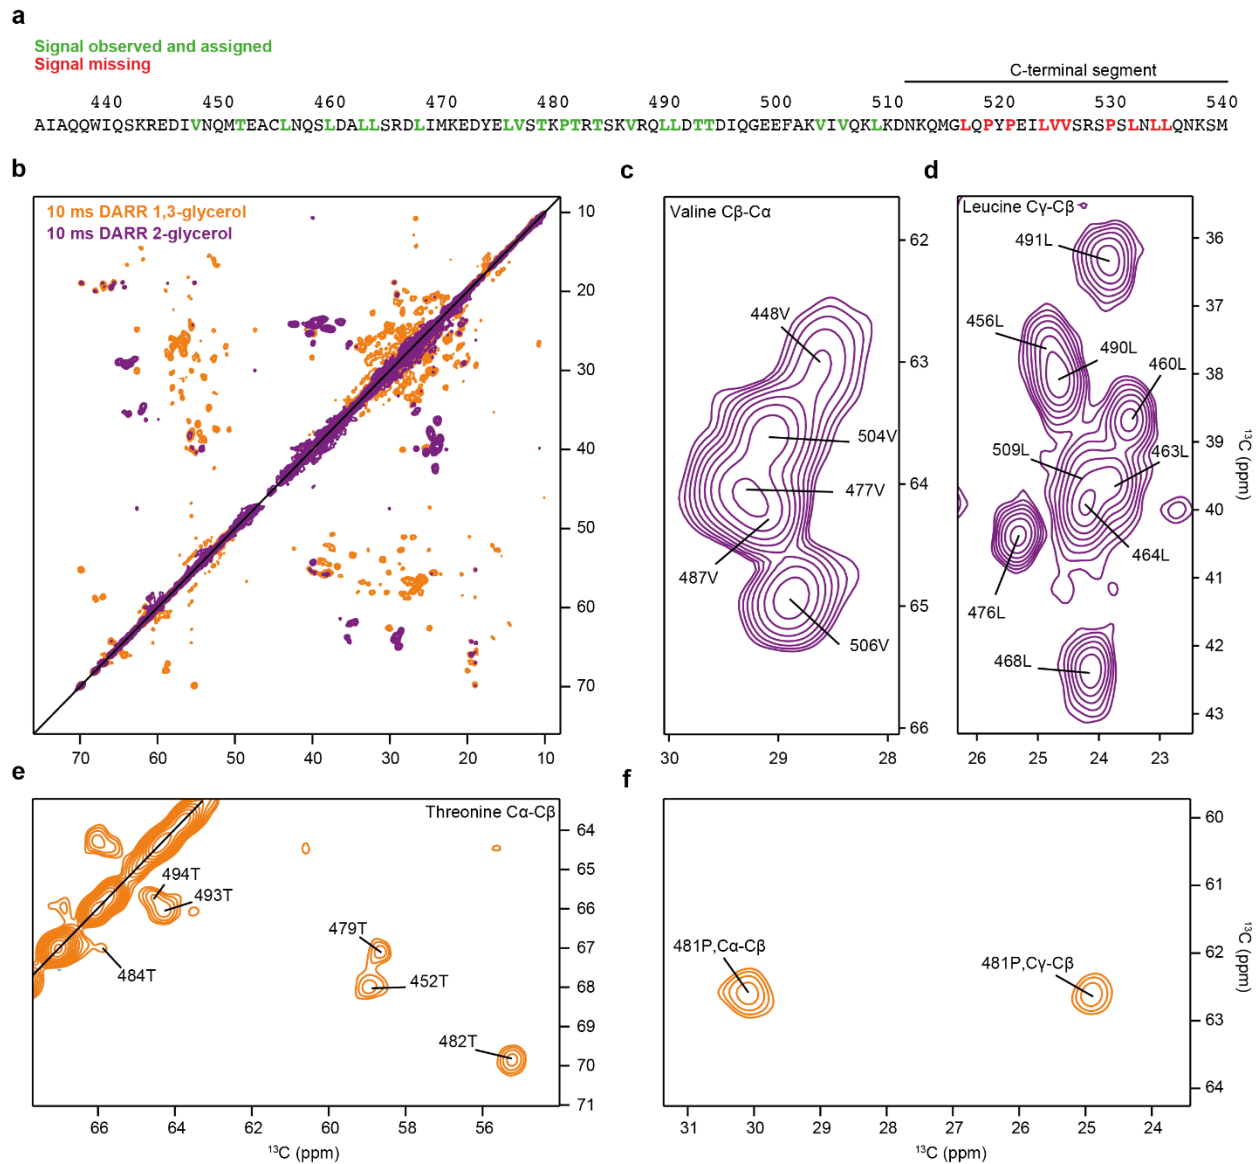

**Supplementary Figure 5: The signals of the RIP2CARD C-terminus are missing in  $^{13}\text{C}$ -detected solid-state NMR experiments.**

a: Sequence of RIP2CARD with residues highlighted, that show assigned cross-peaks in the  $^{13}\text{C}$ -detected NMR spectra (green) and residues that are missing in the spectra (red) corresponding to the C-terminal segment of the protein (512-540).

b: Superposition of 10 ms DARR spectra of 1,3-glycerol-labelled (orange) and 2-glycerol-labelled (purple) RIP2CARD.

c-f: Sections of the spectra in (b), highlighting the regions that include the characteristic cross peak patterns of (c) valine, (d) leucine, (e) threonine and (f) proline residues. Sequence-specific assignments are indicated.



**a RIP2CARD filaments**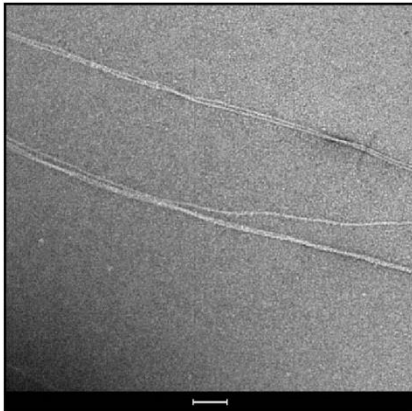**b NOD2CARDS<sup>s</sup> - RIP2CARD filaments**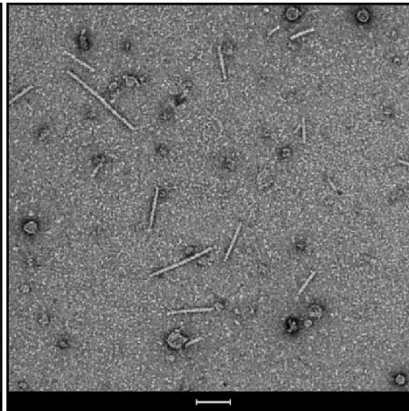**c RIP2CARD filaments****+ Ab1 and Ab2 (C1)**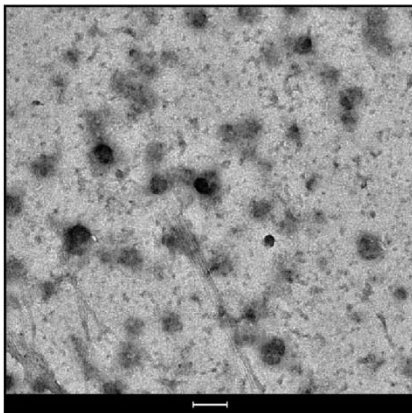**d NOD2CARDS<sup>s</sup> - RIP2CARD filaments****+ Ab2 (C2)**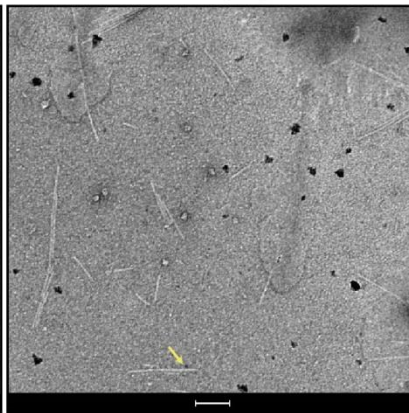**e NOD2CARDS<sup>s</sup> - RIP2CARD filaments****+ Ab1 and Ab2**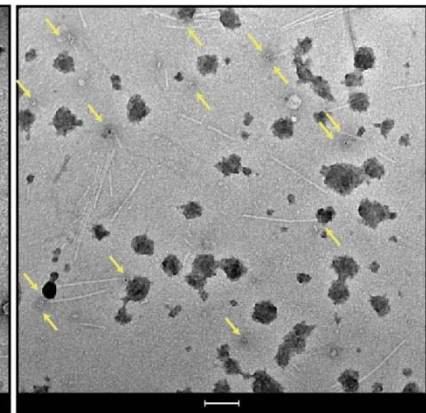**f**

| Sample                                    | Rip2CARD filaments                     | NOD2CARDS <sup>s</sup> + Rip2CARD filaments | NOD2CARDS <sup>s</sup> + Rip2CARD filaments      |
|-------------------------------------------|----------------------------------------|---------------------------------------------|--------------------------------------------------|
| ANTI-SNAP                                 | +                                      | -                                           | +                                                |
| gold-ANTI-RABBIT                          | +                                      | +                                           | +                                                |
| total number of gold particles            | 81                                     | 15                                          | 227                                              |
| number of gold-particles on filaments     | 9.9 %                                  | 13.3%                                       | 70.9%                                            |
| number of gold-particles on filament-ends | gold-particles to aggregated filaments | only one gold particle bound to filaments   | 91.7% (of number of gold particles on filaments) |

**Supplementary Figure 6: Analysis of the binding position of NOD2CARDS<sup>S</sup> on RIP2CARD filaments.**

a-b: Negative-stain images of (a) RIP2CARD filaments and (b) NOD2CARDS<sup>S</sup> -RIP2CARD filaments. Samples (a) and (b) were used for immuno-gold labelling experiments (see Figure 5).

c-e: Representative micrographs showing gold-particle counting for (c) RIP2CARD filaments sample (Control 1, C1), (d) NOD2CARDS<sup>S</sup> -RIP2CARD filaments without first antibody (Control 2, C2), (e) NOD2CARDS<sup>S</sup> -RIP2CARD filaments. Gold-particles are indicated by yellow arrows. (Ab1=anti-SNAP, Ab2=gold-anti-rabbit).

f: Statistics on gold-particle counting. Total number of particles and percentage bound to filaments/filament-ends are reported for each condition analysed.

Scale bars are 100 nm.

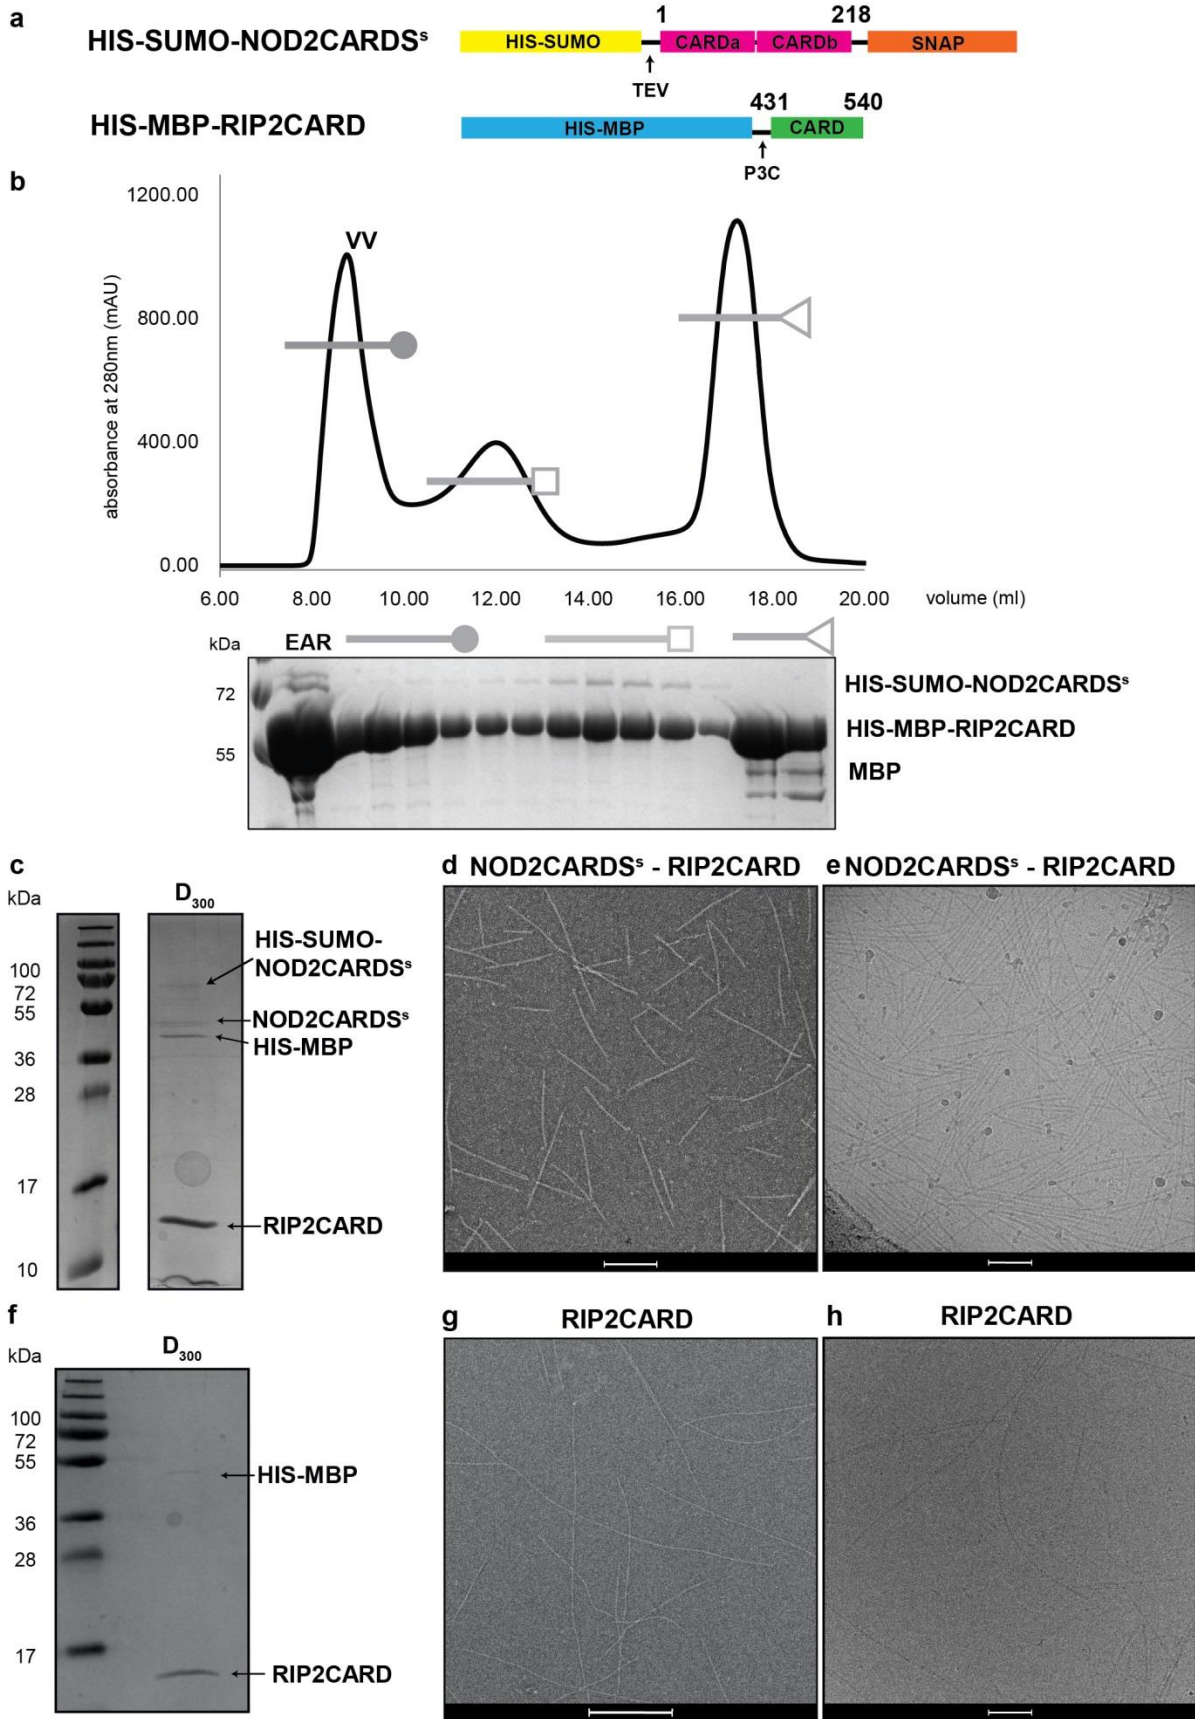

**Supplementary Figure 7: Purification and imaging of RIP2CARD and NOD2CARDS<sup>S</sup>-RIP2CARD filaments**

a: Domain organization of NOD2CARDS and RIP2CARD constructs used to produce filaments for cryo-EM application.

b: Size exclusion chromatography profile and corresponding 12.5% SDS-PAGE of NOD2CARDS<sup>S</sup>-RIP2CARD sample before tag cleavage (VV= size exclusion chromatography void volume). The central peak fractions were used to recombine the tagged NOD2CARDS<sup>S</sup>-RIP2CARD complex with the monomeric HIS-MBP-RIP2CARD.

c: 17% SDS-PAGE of NOD2CARDS<sup>S</sup>-RIP2CARD filament sample used for cryo-EM (D<sub>300</sub>=sample after dialysis with 300 kDa membrane cut off). Lanes in between the markers and D<sub>300</sub> were deleted for clarity.

d-e: (d) Negative-stain and (e) cryo-EM images of RIP2CARD filaments with NOD2CARDS<sup>S</sup> bound. Scale bars are 200 and 100 nm respectively.

f: 17% SDS-PAGE of RIP2CARD filament sample used for cryo-EM (D<sub>300</sub>=sample after dialysis with 300 kDa membrane cut off).

g-h: (g) Negative-stain and (h) cryo-EM images of RIP2CARD filaments. Scale bars are 500 and 100 nm respectively.

**a**

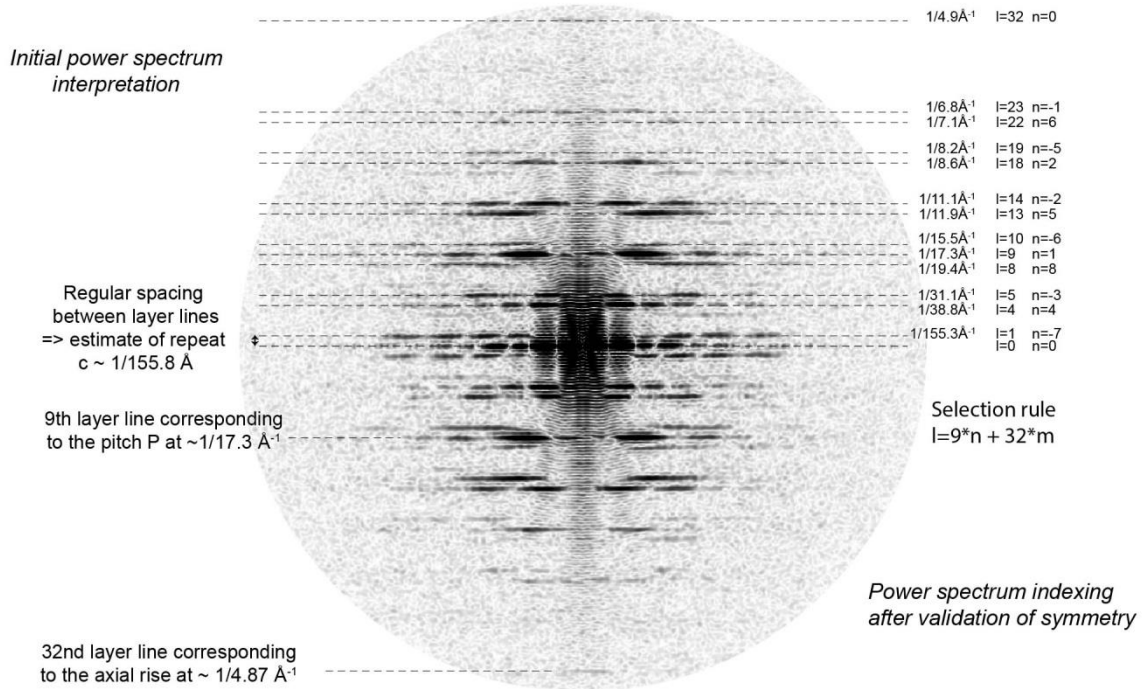

**b**

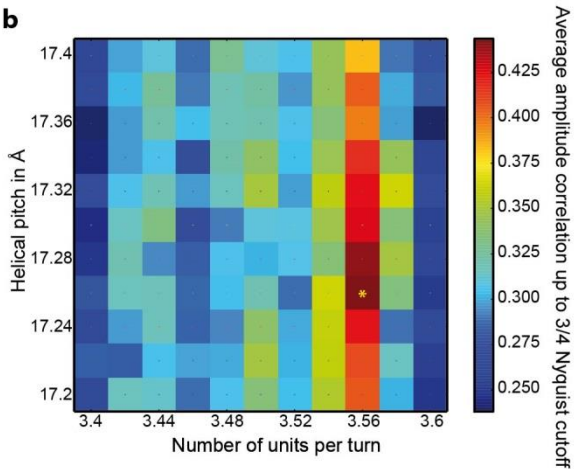

**c**

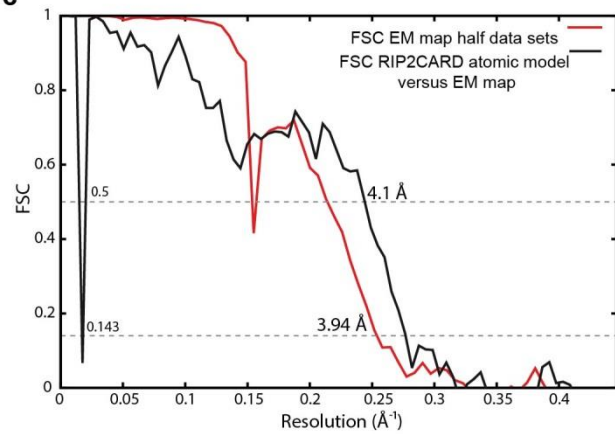

**d**

**Image processing statistics**

|                                                                                           | Manual picked dataset used for 2D classification | Automatically picked dataset used for 3D reconstruction |
|-------------------------------------------------------------------------------------------|--------------------------------------------------|---------------------------------------------------------|
| Resolution at FSC 0.5 / 0.143 $\text{\AA}$                                                | -                                                | 4.5 / 3.94                                              |
| Total length of non-overlapping segments before selection, $\mu\text{m}$                  | 97                                               | 260                                                     |
| Number of filament sections before selection                                              | 4,125                                            | 4,443                                                   |
| Segment size, $\text{\AA}$                                                                | 508.2                                            | 400                                                     |
| Segment step size, $\text{\AA}$                                                           | 25                                               | 70                                                      |
| Number of segments before selection                                                       | 23,742                                           | 37,043                                                  |
| Number of segments finally included in reconstruction                                     | -                                                | 9,661                                                   |
| Pitch in $\text{\AA}$ / Units per turn [helical rise, $\text{\AA}$ / rotation, $^\circ$ ] | -                                                | 17.26 / 3.56 [4.848 / -101.124]                         |
| Number of asymmetric units included in final reconstruction                               | -                                                | 135,254                                                 |

### **Supplementary Figure 8: Symmetry determination and image processing statistics**

a: Power spectra of a selected 2D class-average (Figure 6b), its initial interpretation (left) and the indexing (right) corresponding to the final symmetry (pitch 17.26 Å, 3.56 units/turn).

b: Symmetry refinement. The maximum correlation (indicated by an asterisk) occurs at units per turn/pitch of 3.56/17.26 Å.

c: Fourier Shell Correlation (FSC) curve between half data sets (red) and FSC curve between unfiltered, unsharpened map and the final atomic model of RIP2CARD within the filament.

d: Image processing statistics of the datasets used for 2D classification and 3D reconstruction.

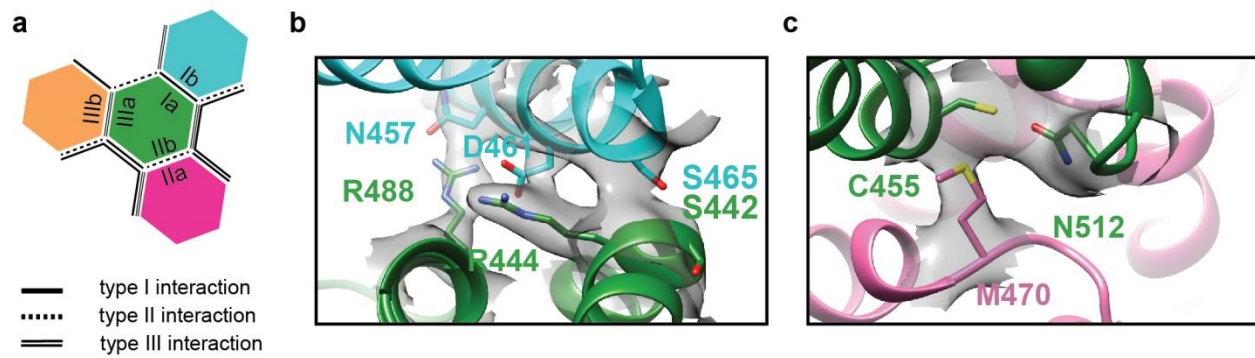

**Supplementary Figure 9: Cryo-EM density at type I and type II interfaces**

a: Relative orientations of type I, type II and type III interface within RIP2CARD filament.

b-c: EM density at (b) type I and (c) type II interfaces. Corresponding residue interactions are described in the main text.

a

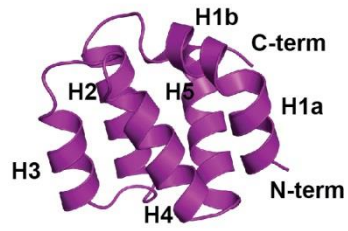

3D model of NOD2CARDa

b hetero-type I interaction

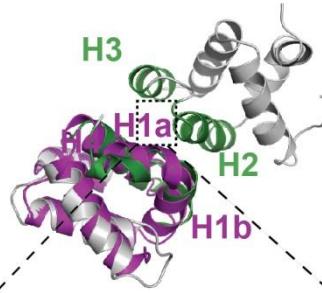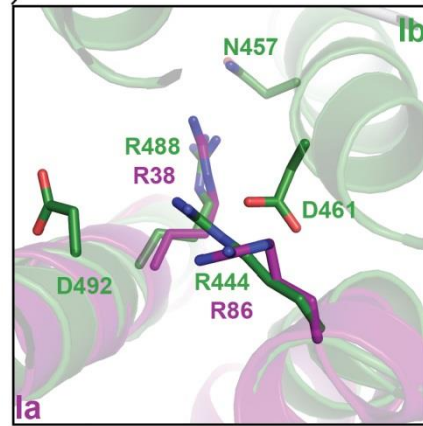

Fridh *et al.*, 2012

c

hetero-type III interaction

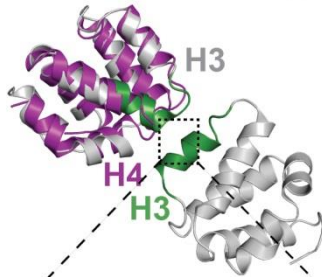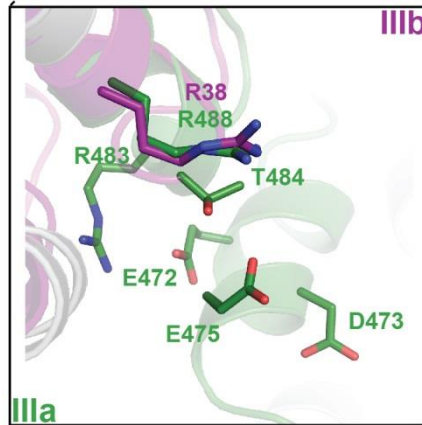

Fridh *et al.*, 2012

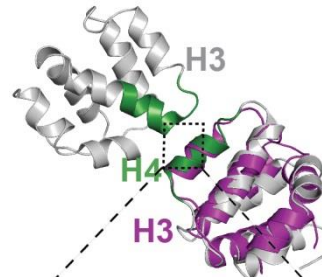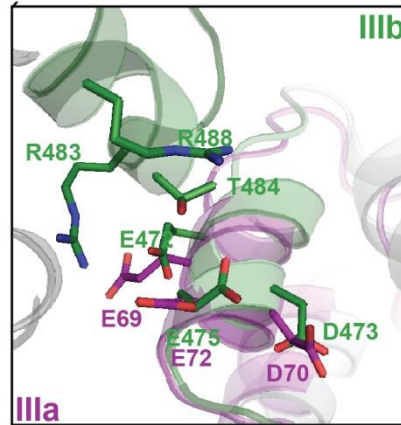

Wagner *et al.*, 2009



### **Supplementary Figure 10: Model of the hetero-CARD type I and III interactions**

a: Ribbon diagram of NOD2CARDa model produced using Swiss-Model<sup>3</sup>.

b-c: Ribbon diagrams of the putative hetero-CARD dimer interactions at (b) type I and (c) type III interfaces. The NOD2CARDa model was superposed on one of the RIP2CARD molecules in the equivalent RIP2CARD homo-dimers. The insets show the putative residue interactions at each interface, green (RIP2), purple (NOD2). The NOD2CARDa residues shown have been implicated in interactions with RIP2CARD<sup>4,5</sup>. In the hetero type I interface, NOD2CARDa type Ia surface comprises residues R38 and R86, which are equivalent to R488 and R444 in RIP2CARD, and therefore might preserve the polar interactions with N547 and D461 in RIP2CARD type Ib surface. For the hetero-CARD type III interaction, the experimental data is consistent with either basic residues of NOD2 interacting with the acidic patch on RIP2 (left) or vice versa (right).

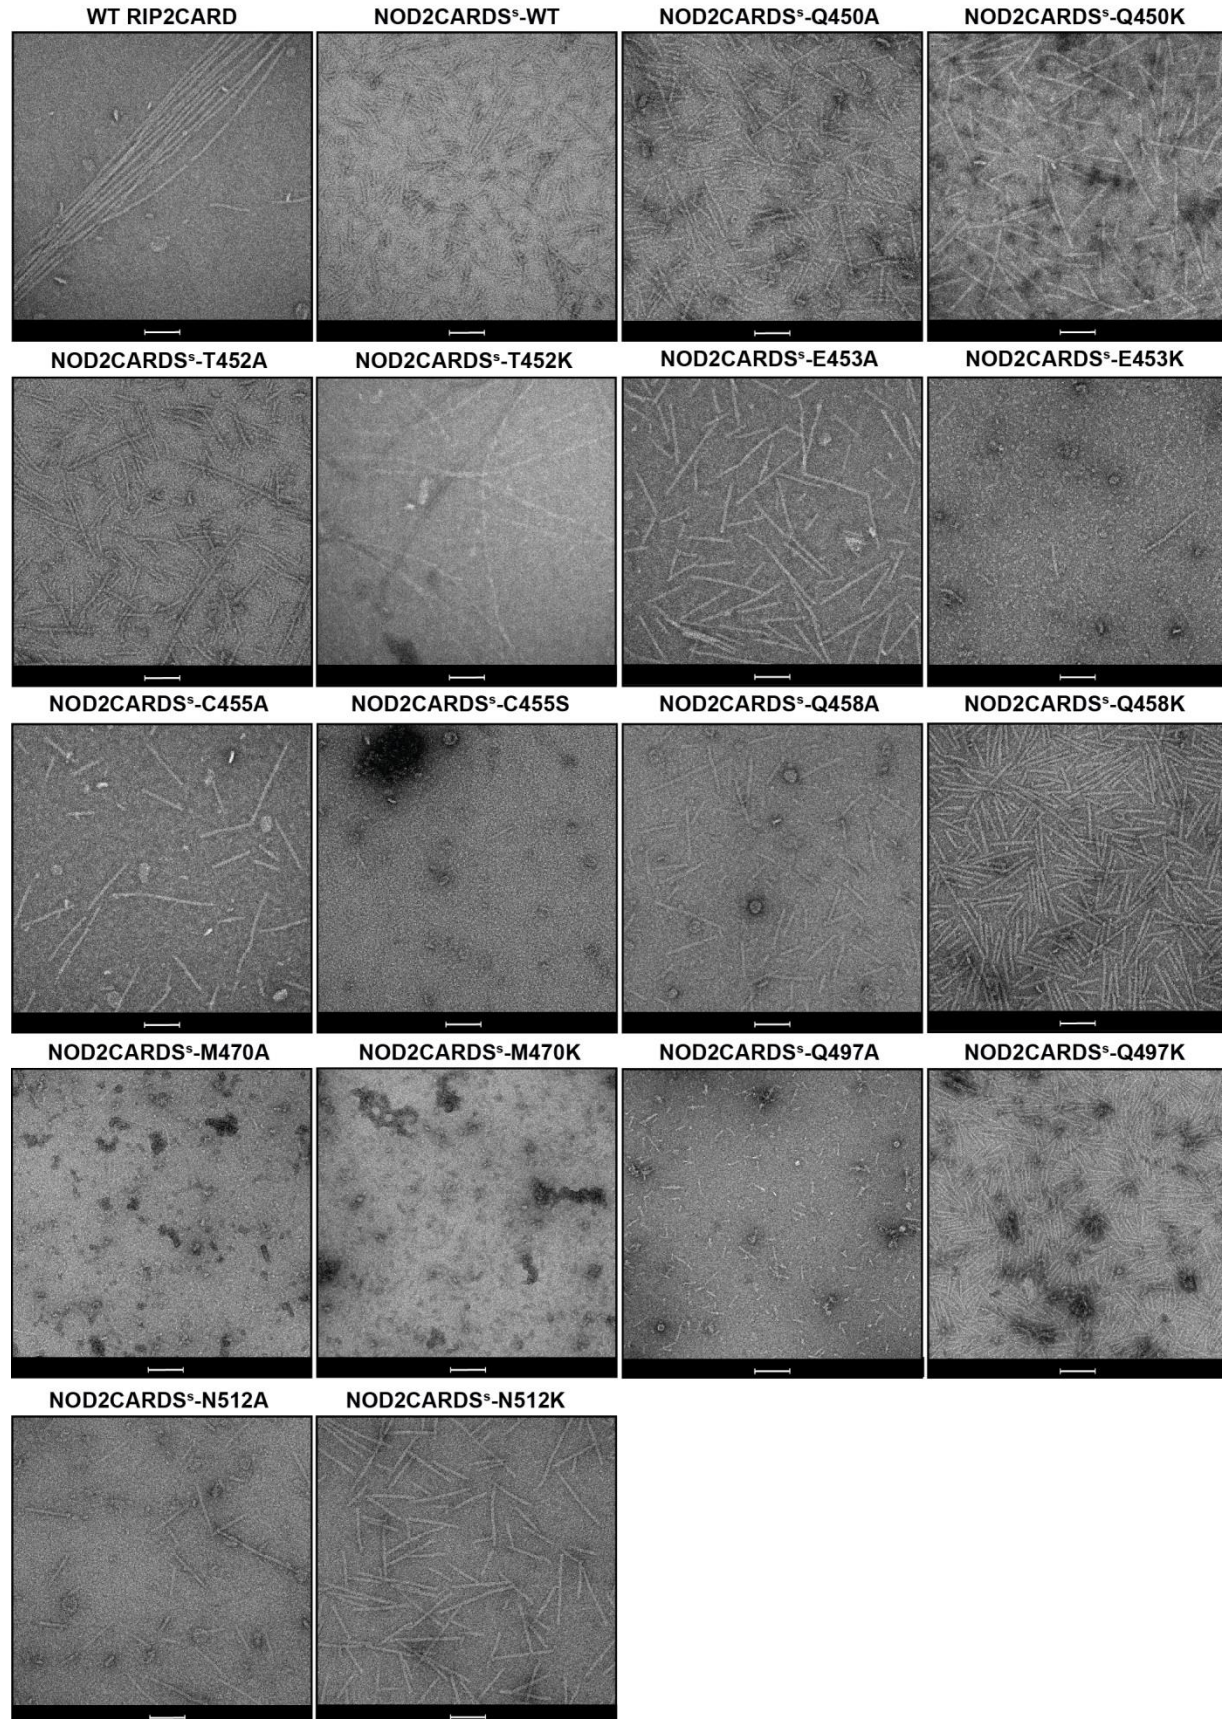

**Supplementary Figure 11: Effect of type II interface residue mutations on RIP2CARD polymerization *in vitro*.**

Example negative-stain electron micrographs of wild-type RIP2CARD and NOD2CARDS<sup>S</sup>-RIP2CARD filaments (top left pair) and NOD2CARDS<sup>S</sup> combined with all RIP2CARD mutants, after tag cleavage. Scale bars are 100 nm.

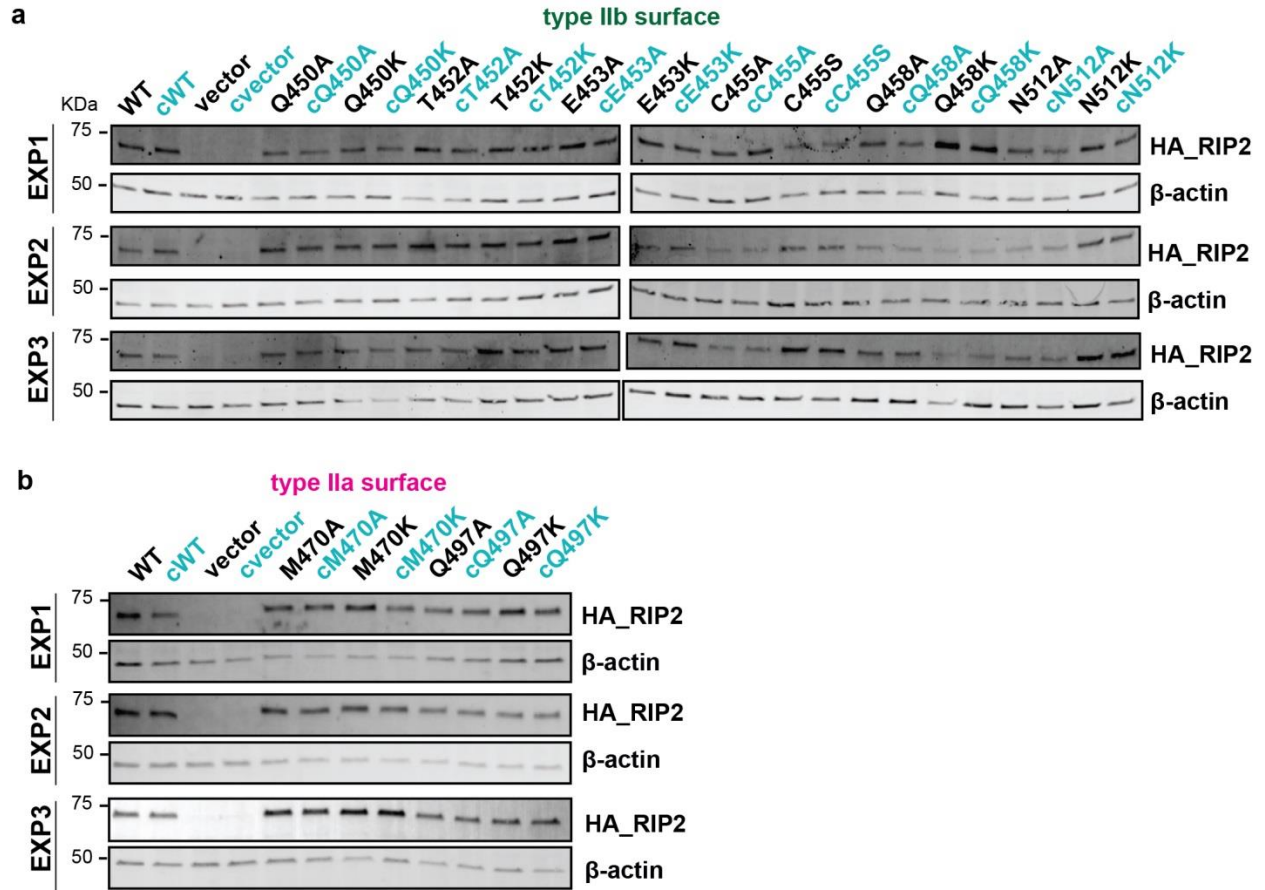

**Supplementary Figure 12: Western blot for in-cell based assay.**

One Western blot per biological replicate for (a) type IIb and (b) type IIa surface mutants is shown. Replicates are labelled as: EXP1, EXP2, EXP3 (EXP=experiment). For each EXP, expression of wild-type (WT) HA-RIP2fl and mutants (right) and  $\beta$ -actin (left) are shown. For each construct, the results for cells induced by either MDP or its control (cMDP, c) are labelled in black and cyan respectively.

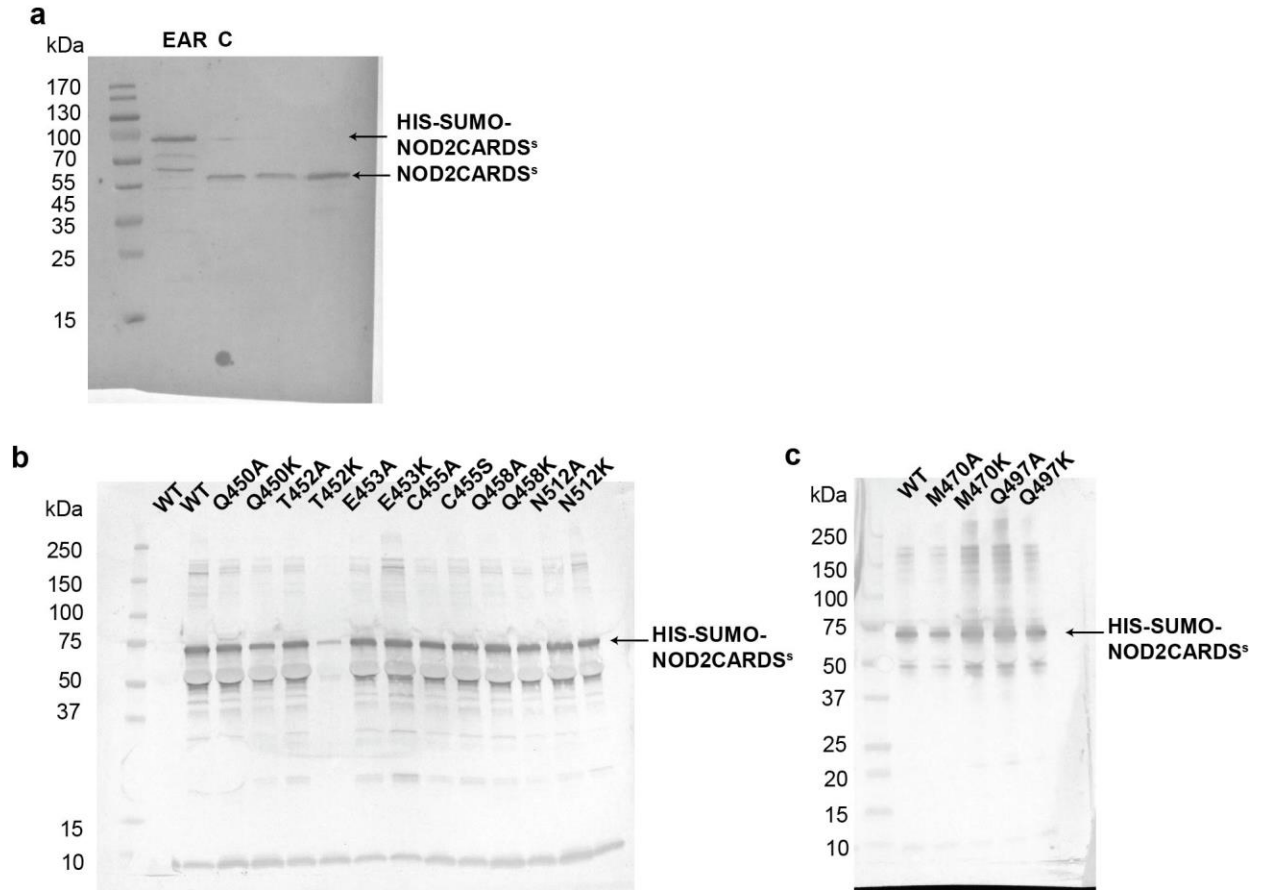

Supplementary Figure 13: Uncropped blots corresponding to (a) Figure 5c, (b-c) Figure 8b.

type IIb surface

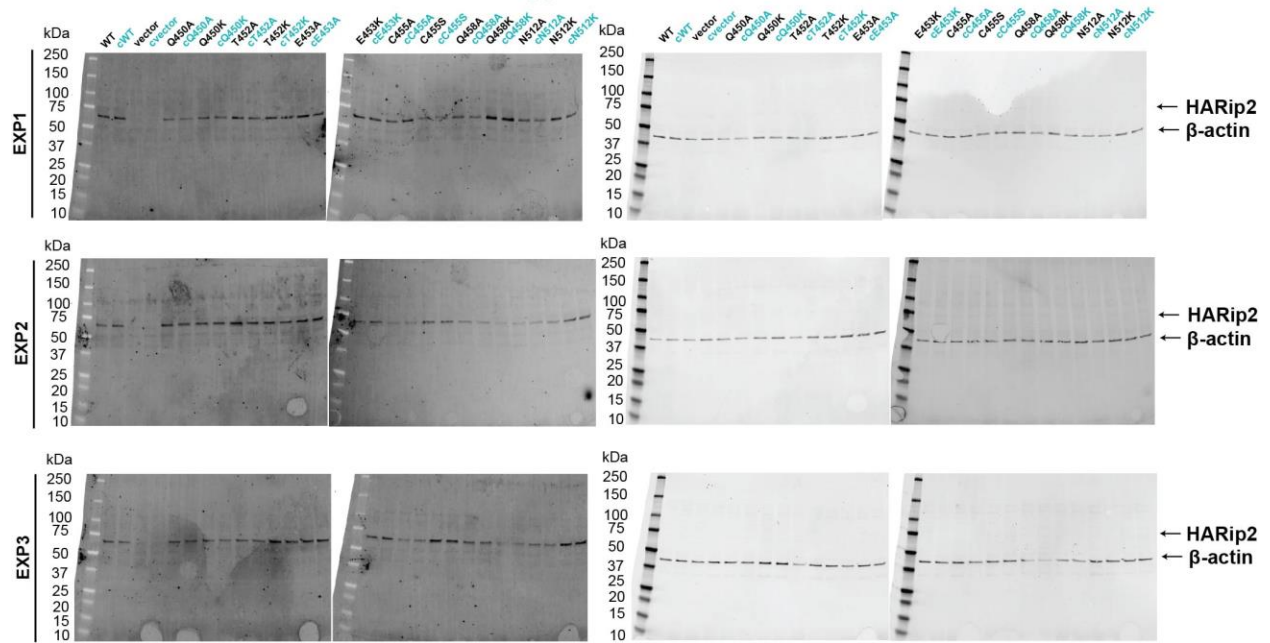

Supplementary Figure 14: Uncropped blots corresponding to Figure 9b and Supplementary Figure 12a.

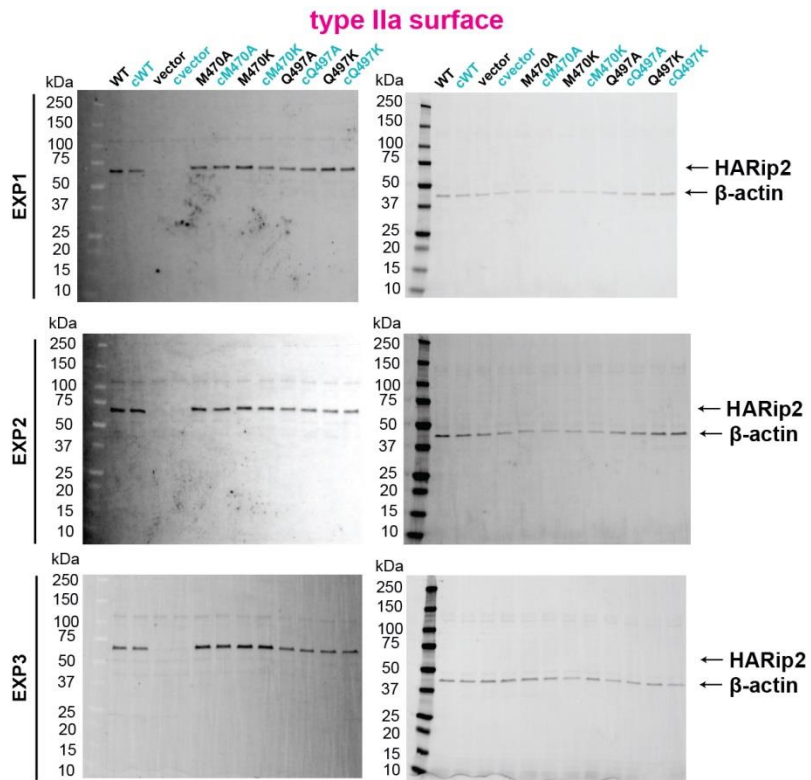

**Supplementary Figure 15: Uncropped blots corresponding to Figure 9b and Supplementary Figure 12b.**

**Supplementary Table 1. Crystallographic data collection and refinement statistics.**

| crystMBP-RIP2CARD (PDB 6GFJ)                        |                                                                                                                                                                                      |
|-----------------------------------------------------|--------------------------------------------------------------------------------------------------------------------------------------------------------------------------------------|
| <b>Data collection</b>                              |                                                                                                                                                                                      |
| Space group                                         | <i>P</i> 21                                                                                                                                                                          |
| Cell dimensions                                     |                                                                                                                                                                                      |
| <i>a</i> , <i>b</i> , <i>c</i> (Å)                  | 89.46, 121.57, 123.16                                                                                                                                                                |
| $\alpha$ , $\beta$ , $\gamma$ (°)                   | 90.00, 109.04, 90.00                                                                                                                                                                 |
| Resolution (Å)                                      | 46.98-3.29(3.38-3.29)*                                                                                                                                                               |
| <i>R</i> <sub>meas</sub>                            | 0.19 (1.37)                                                                                                                                                                          |
| <i>I</i> / $\sigma$ <i>I</i>                        | 5.45 (0.99)                                                                                                                                                                          |
| CC(1/2)                                             | 0.993 (0.437)                                                                                                                                                                        |
| Completeness (%)                                    | 98.5 (86.9)                                                                                                                                                                          |
| Redundancy                                          | 3.80 (3.42)                                                                                                                                                                          |
| <b>Refinement</b>                                   |                                                                                                                                                                                      |
| Resolution (Å)                                      | 46.98-3.30                                                                                                                                                                           |
| No. reflections                                     | 37320                                                                                                                                                                                |
| <i>R</i> <sub>work</sub> / <i>R</i> <sub>free</sub> | 0.235/0.266                                                                                                                                                                          |
| No. atoms                                           | 14268                                                                                                                                                                                |
| Protein                                             | 2841, 712 (MBP_Chain A, CARD chain S)<br>2841, 712 (MBP_Chain B, CARD chain T)<br>2841, 703 (MBP_Chain C, CARD chain X)<br>2841, 712 (MBP_Chain D, CARD chain Y)                     |
| Ligand/ion                                          | 4 maltose (MAL)                                                                                                                                                                      |
| Water                                               | 0                                                                                                                                                                                    |
| <i>B</i> -factors (Å <sup>2</sup> )                 | 131.50                                                                                                                                                                               |
| Protein                                             | 124.40, 132.33 (MBP_Chain A, CARD chain S)<br>133.69, 132.33 (MBP_Chain B, CARD chain T)<br>127.31, 152.31 (MBP_Chain C, CARD chain X)<br>132.25, 146.02 (MBP_Chain D, CARD chain Y) |
| Ligand/ion                                          | 95.47 (MAL_A)<br>106.11 (MAL_B)<br>101.07 (MAL_C)<br>146.02 (MAL_D)                                                                                                                  |
| R.m.s. deviations                                   |                                                                                                                                                                                      |
| Bond lengths (Å)                                    | 0.007                                                                                                                                                                                |
| Bond angles (°)                                     | 1.053                                                                                                                                                                                |

Values in parentheses are for the highest-resolution shell.



**Supplementary Table 2: Solid state NMR chemical shift assignment of RIP2CARD on the basis of  $^1\text{H}$ -detected experiments**

|      | H    | N      | C      | C $\alpha$ | C $\beta$ |      | H    | N      | C      | C $\alpha$ | C $\beta$ |
|------|------|--------|--------|------------|-----------|------|------|--------|--------|------------|-----------|
| 441Q | 7.58 | 117.10 | 175.76 | 56.01      | 24.91     | 476L | 8.39 | 120.42 | 176.00 | 54.49      | 39.75     |
| 442S | 8.07 | 113.32 | 172.39 | 57.96      | 60.35     | 477V | 7.44 | 116.70 | 173.40 | 63.45      | 28.80     |
| 443K | 7.46 | 119.72 | 173.10 | 50.53      | 27.41     | 478S | 7.88 | 109.32 | 172.00 | 58.27      | 60.95     |
| 444R | 7.20 | 122.69 | 173.26 | 57.73      | 27.87     | 479T | 7.50 | 107.11 | 172.58 | 58.26      | 66.98     |
| 445E | 8.06 | 112.45 | 174.23 | 56.43      | 27.27     | 480K | 7.07 | 123.88 | 173.14 | 50.56      | 26.44     |
| 446D | 7.21 | 116.65 | 174.59 | 53.58      | 38.23     | 481P |      |        | 174.05 | 62.04      | 29.59     |
| 447I | 8.50 | 120.33 | 174.81 | 63.27      | 34.72     | 482T | 6.83 | 104.25 | 170.07 | 54.76      | 69.71     |
| 451M |      |        | 173.00 |            |           | 483R | 8.91 | 124.65 | 174.57 | 57.18      | 25.62     |
| 452T | 9.02 | 118.80 | 171.85 | 58.46      | 67.89     | 484T | 9.06 | 113.77 | 172.25 | 65.27      | 66.64     |
| 453E | 9.31 | 120.24 | 174.60 | 57.30      | 26.43     | 485S | 8.08 | 114.26 | 175.54 | 58.45      | 60.30     |
| 454A | 8.60 | 116.91 | 176.20 | 51.86      | 15.96     | 486K | 8.48 | 126.21 | 175.06 | 57.51      | 31.50     |
| 455C | 7.51 | 122.61 | 173.81 | 59.55      |           | 487V | 8.28 | 118.82 | 175.24 | 63.65      | 28.48     |
| 456L | 8.29 | 125.61 | 174.99 | 55.24      | 37.21     | 488R | 8.76 | 118.43 | 174.21 | 58.27      | 26.87     |
| 457N | 8.60 | 118.37 | 174.17 | 52.82      | 34.50     | 489Q | 8.13 | 118.26 | 176.17 | 55.07      | 24.02     |
| 458Q | 8.66 | 119.75 | 175.62 | 55.98      | 26.91     | 490L | 8.60 | 124.50 | 176.92 | 55.38      | 37.51     |
| 459S | 8.20 | 117.02 | 172.14 | 60.85      | 59.66     | 491L | 8.94 | 123.70 | 176.50 | 55.35      | 36.03     |
| 460L | 7.87 | 120.66 | 175.10 | 55.23      | 38.13     | 492D | 9.22 | 123.48 | 176.19 | 54.24      | 36.46     |
| 461D | 8.66 | 118.57 | 175.24 | 55.14      | 37.94     | 493T | 8.01 | 117.34 | 171.83 | 63.90      | 65.84     |
| 462A | 8.16 | 123.45 | 176.99 | 51.57      | 15.97     | 494T | 8.26 | 120.35 | 171.54 | 63.97      | 65.50     |
| 463L | 8.06 | 120.01 | 176.54 | 54.94      | 39.19     | 495D | 7.40 | 117.43 | 175.53 | 53.74      | 39.08     |
| 464L | 8.72 | 121.76 | 178.06 | 54.85      | 39.48     | 496I | 6.81 | 115.09 |        | 59.30      |           |
| 465S | 8.36 | 117.19 | 172.42 | 58.31      | 60.94     | 498G | 7.88 | 104.37 | 171.21 | 42.29      |           |
| 466R | 7.04 | 117.75 | 171.32 | 52.16      | 28.06     | 499E | 8.36 | 120.74 | 174.87 | 55.88      | 27.42     |
| 467D | 8.11 | 118.96 | 172.25 | 52.12      | 37.09     | 500E | 8.71 | 118.19 | 175.15 | 56.58      | 25.78     |
| 468L | 8.34 | 114.84 | 172.33 | 52.18      | 41.59     | 501F | 7.75 | 120.48 | 173.76 | 56.66      | 37.57     |
| 469I | 6.80 | 114.12 | 169.77 | 53.79      | 39.20     | 502A | 8.05 | 118.45 | 175.88 | 52.14      | 15.36     |
| 470M | 9.86 | 127.86 | 174.96 | 53.24      | 30.43     | 503K | 8.81 | 116.74 | 175.61 | 57.42      | 29.70     |
| 471K | 8.92 | 125.45 | 175.29 | 57.41      | 26.87     | 504V | 7.19 | 118.53 | 174.10 | 63.07      | 28.48     |
| 472E | 9.39 | 117.53 | 174.58 | 56.32      | 25.65     | 505I | 6.96 | 118.30 | 174.64 | 61.56      | 34.52     |
| 473D | 6.66 | 118.12 | 175.75 | 54.98      | 37.66     | 506V | 8.18 | 117.27 | 173.77 | 64.36      | 28.25     |
| 474Y | 8.33 | 123.02 | 174.40 | 57.63      | 34.02     | 507Q | 7.92 | 117.47 | 174.61 | 55.74      | 25.07     |
| 475E | 8.89 | 123.35 | 176.15 | 56.17      | 26.51     |      |      |        |        |            |           |

**Supplementary Table 3. Cryo-EM data collection, refinement and validation statistics**

---

|                                                  | RIP2CARD filament<br>(PDB-6GGS, EMD-4399) |
|--------------------------------------------------|-------------------------------------------|
| <b>Data collection and processing</b>            |                                           |
| Magnification                                    | 41270x                                    |
| Voltage (kV)                                     | 300                                       |
| Electron exposure (e-/Å <sup>2</sup> )           | 50                                        |
| Defocus range (µm)                               | -1.5 to 3                                 |
| Pixel size (Å)                                   | 1.21                                      |
| Symmetry imposed                                 | Helical                                   |
| Initial particle images (no.)                    | 37043                                     |
| Final particle images (no.)                      | 9661                                      |
| Map resolution (Å)                               | 3.94                                      |
| FSC threshold                                    | 0.143                                     |
| Map resolution range (Å)                         | 3.6-4.2                                   |
| <b>Refinement</b>                                |                                           |
| Initial model used (PDB code)                    | 6GFJ (Chain S), this study                |
| Model resolution (Å)                             | 3.3                                       |
| Map sharpening <i>B</i> factor (Å <sup>2</sup> ) | -200                                      |
| Model composition                                | Chain F                                   |
| Protein residues                                 | 85 (residues 433-518)                     |
| <i>B</i> factors (Å <sup>2</sup> )               | 124.7                                     |
| R.m.s. deviations                                |                                           |
| Bond lengths (Å)                                 | 0.0063                                    |
| Bond angles (°)                                  | 1.43                                      |
| Validation                                       |                                           |
| MolProbity score                                 | 2.08                                      |
| Clashscore                                       | 14.46                                     |
| Poor rotamers (%)                                | 1.27                                      |
| Ramachandran plot                                |                                           |
| Favored (%)                                      | 95.24                                     |
| Allowed (%)                                      | 4.76                                      |
| Disallowed (%)                                   | 0                                         |

---

**Supplementary Table 4: Helical parameters of DD filament structures**

| Filament  | Rotation per subunit (°) | Rise per subunit (Å) | Number of molecules per turn | Resolution (Å) | Reference                                            |
|-----------|--------------------------|----------------------|------------------------------|----------------|------------------------------------------------------|
| RIP2CARD  | -101.12                  | 4.84                 | 3.56                         | 4.0            | this paper                                           |
| Caspase-1 | -100.21                  | 5.1                  | 3.59                         | 4.8            | Lu, A. <i>et al</i> 2016                             |
| B110      | -100.8                   | 5                    | 3.57                         | 4              | David, L. <i>et al</i> 2018                          |
| MAVS      | -101.1<br>-101.21        | 5.1<br>5.06          | 3.56<br>3.56                 | 3.6/4.12       | Wu, B. <i>et al</i> 2014<br>Xu, L. <i>et al</i> 2014 |

**Supplementary Table 5: Oligos used for mutagenesis**

| <b>Constructs</b>    | <b>Oligos</b>                                                                |
|----------------------|------------------------------------------------------------------------------|
| <b>Q450A</b>         | 5'-GACATTGTGAACGCAATGACAGAAGCC -3'                                           |
| <b>Q450K</b>         | 5'-AAGACATTGTGAACAAAATGACAGAAGCC-3'                                          |
| <b>T452A</b>         | 5'-GTGAACCAAATGGCAGAAGCCTGC-3'                                               |
| <b>T452K</b>         | 5'-GTGAACCAAATGAAAGAAGCCTGC-3'                                               |
| <b>E453A</b>         | 5'-CCAAATGACAGCAGCCTGCCTTAAC-3'                                              |
| <b>E453K</b>         | 5'-CCAAATGACAAAAGCCTGCC-3'                                                   |
| <b>C455A</b>         | 5'-GACAGAAGCCGCCCTTAACCAGTC-3'                                               |
| <b>C455S</b>         | 5'-GCCCTTCTGTGCAGGGA-3'                                                      |
| <b>Q458A</b>         | 5'-CCTGCCTTAACGCGTCGCTAGATG-3'                                               |
| <b>Q458K</b>         | 5'-GCCTTAACAAGTCGCTAGATGCC-3'                                                |
| <b>M470A</b>         | 5'-GGACTTGATCGCGAAAGAGGACTATG-3'                                             |
| <b>M470K</b>         | 5'-GGACTTGATCAAGAAAGAGGACTATG-3'                                             |
| <b>Q497A</b>         | 5'-CTACTGACATCGCAGGAGAAGAATTTG-3'                                            |
| <b>Q497K</b>         | 5'-CTACTGACATCAAAGGAGAAGAATTTG-3'                                            |
| <b>N512A</b>         | 5'-GTACAAAAATTGAAAGATGCAAAACAAATGGGTCTTCAG-3'                                |
| <b>N512K</b>         | 5'-GTACAAAAATTGAAAGATAAAAAACAAATGGGTCTTCAG-3'                                |
| <b>pcDNA-HA-RIP2</b> | 5'-TGCAGACCCTGCAGACCCAGCGTAGTCTGGGACGTCGTA<br>TGGGTACTCGAGGGCCATGGTGGTATC-3' |
| <b>pcDNA-HA-RIP2</b> | 5'-GCAGGGTCTGCAATGAACGGGGAGGCCATCTGCAGCGC<br>CCTGCCACCATTCCCTACCACAAACTC-3'  |

### Supplementary References.

- 1 Poirot, O., Suhre, K., Abergel, C., O'Toole, E. & Notredame, C. 3DCoffee@igs: a web server for combining sequences and structures into a multiple sequence alignment. *Nucleic acids research* **32**, W37-40, doi:10.1093/nar/gkh382 (2004).
- 2 Robert, X. & Gouet, P. Deciphering key features in protein structures with the new ENDscript server. *Nucleic acids research* **42**, W320-324, doi:10.1093/nar/gku316 (2014).
- 3 Biasini, M. *et al.* SWISS-MODEL: modelling protein tertiary and quaternary structure using evolutionary information. *Nucleic acids research* **42**, W252-258, doi:10.1093/nar/gku340 (2014).
- 4 Wagner, R. N., Proell, M., Kufer, T. A. & Schwarzenbacher, R. Evaluation of Nod-like receptor (NLR) effector domain interactions. *PloS one* **4**, e4931, doi:10.1371/journal.pone.0004931 (2009).
- 5 Fridh, V. & Rittinger, K. The tandem CARDS of NOD2: intramolecular interactions and recognition of RIP2. *PloS one* **7**, e34375, doi:10.1371/journal.pone.0034375 (2012).
